# Supplementary material for: Despite Being Distinguished as the 2020 European Green Capital, Lisbon Has Lost Public Green Areas over the Previous Decade
Source: MDPI journal article supplement (doi:10.3390/su141912112), 2022-09-25
Supplement: s1 [file s1]

# Supplementary data

**Table S1.** List of the 24 parishes that currently comprise the city of Lisbon, and the changes that occurred in relation to 2010 (in 2010 there were 53 parishes). During this period, there was a reorganization of the parishes under the Municipal Master Plan [1]. The parishes that did not change during this period are shaded in grey.

| 2020 |                         | 2010                                                                                                                                                        |
|------|-------------------------|-------------------------------------------------------------------------------------------------------------------------------------------------------------|
| 01   | Ajuda                   | =                                                                                                                                                           |
| 02   | Alcântara               | =                                                                                                                                                           |
| 03   | Alvalade                | Alvalade + Campo Grande +São João de Brito                                                                                                                  |
| 04   | Areeiro                 | Alto do Pina + São João de Deus                                                                                                                             |
| 05   | Arroios                 | Anjos + Pena + São Jorge de Arroios                                                                                                                         |
| 06   | Avenidas Novas          | Nossa Senhora de Fátima + São Sebastião de Pedreira                                                                                                         |
| 07   | Beato                   | =                                                                                                                                                           |
| 08   | Belém                   | Santa Maria de Belém + São Francisco Xavier                                                                                                                 |
| 09   | Benfica                 | =                                                                                                                                                           |
| 10   | Campo de Ourique        | Santa Isabel + Santo Condestável                                                                                                                            |
| 11   | Campolide               | =                                                                                                                                                           |
| 12   | Carnide                 | =                                                                                                                                                           |
| 13   | Estrela                 | Lapa + Prazeres + Santos-o-Velho                                                                                                                            |
| 14   | Lumiar                  | =                                                                                                                                                           |
| 15   | Marvila                 | =                                                                                                                                                           |
| 16   | Misericórdia            | Encarnação + Mercês + Santa Catarina + São Paulo                                                                                                            |
| 17   | Olivais                 | Santa Maria dos Olivais                                                                                                                                     |
| 18   | Parque das Nações       | Santa Maria dos Olivais                                                                                                                                     |
| 19   | Penha de França         | Penha de França + São João                                                                                                                                  |
| 20   | Santa Clara             | Ameixoeira + Charneca                                                                                                                                       |
| 21   | Santa Maria Maior       | Castelo + Madalena + Mártires + Sacramento +Santa Justa + Santiago + Santo Estêvão + São Cristóvão e São Lourenço + São Miguel + São Nicolau + Sé + Socorro |
| 22   | Santo António           | Coração de Jesus + São José + São Mamede                                                                                                                    |
| 23   | São Domingos de Benfica | =                                                                                                                                                           |
| 24   | São Vicente             | Graça + Santa Engrácia + São Vicente de Fora                                                                                                                |

**Table S2.** Characterization of the parishes that comprise the city of Lisbon in 2010 and 2020. Each parish was characterized in terms of total area, public green areas (PGA) and % of PGA, number of residents, and PGA per resident. The city was further characterized in terms of street trees (ST) area.

| 2010             |                        |                       |               |          |                                                       | 2020             |                        |                       |               |          |                                                       |
|------------------|------------------------|-----------------------|---------------|----------|-------------------------------------------------------|------------------|------------------------|-----------------------|---------------|----------|-------------------------------------------------------|
| Parish           | Area (m <sup>2</sup> ) | PGA (m <sup>2</sup> ) | Residents (#) | % of PGA | PGA per resident (m <sup>2</sup> pers <sup>-1</sup> ) | Parish           | Área (m <sup>2</sup> ) | PGA (m <sup>2</sup> ) | Residents (#) | % of PGA | PGA per resident (m <sup>2</sup> pers <sup>-1</sup> ) |
| Ajuda            | 2 850 839              | 1 366 921             | 15 584        | 47.9     | 87.7                                                  | Ajuda            | 2 876 647              | 1014800               | 15 620        | 35.3     | 65.0                                                  |
| Alcântara        | 4 414 985              | 164 098               | 13 943        | 3.7      | 11.8                                                  | Alcântara        | 5 074 844              | 100 000               | 13 943        | 2.0      | 7.2                                                   |
| Alto do Pina     | 838 744                | 52 567                | 10 333        | 6.3      | 5.1                                                   | Alvalade         | 5 341 751              | 234 800               | 31 813        | 4.4      | 7.4                                                   |
| Alvalade         | 594 389                | 130 502               | 8 869         | 22.0     | 14.7                                                  | Areeiro          | 1 719 002              | 94 500                | 20 131        | 5.5      | 4.7                                                   |
| Ameixoeira       | 1 617 231              | 226 313               | 11 863        | 14.0     | 19.1                                                  | Arroios          | 2 127 872              | 36 500                | 31 654        | 1.7      | 1.2                                                   |
| Anjos            | 488 381                | 10 404                | 9 361         | 2.1      | 1.1                                                   | Avenidas Novas   | 2 994 533              | 404 300               | 21 625        | 13.5     | 18.7                                                  |
| Beato            | 1 621 964              | 34 731                | 12 429        | 2.1      | 2.8                                                   | Beato            | 2 483 775              | 40 000                | 12 737        | 1.6      | 3.1                                                   |
| Benfica          | 7 930 372              | 592 701               | 36 821        | 7.5      | 16.1                                                  | Belém            | 10 426 949             | 232 800               | 16 528        | 2.2      | 14.1                                                  |
| Campo Grande     | 2 456 736              | 110 734               | 10 514        | 4.5      | 10.5                                                  | Benfica          | 8 024 545              | 208 100               | 36 985        | 2.6      | 5.6                                                   |
| Campolide        | 2 793 635              | 69 064                | 15 460        | 2.5      | 4.5                                                   | Campo de Ourique | 1 651 405              | 8 200                 | 22 120        | 0.5      | 0.4                                                   |
| Carnide          | 4 081 246              | 24 208                | 23 316        | 0.6      | 1.0                                                   | Campolide        | 2 774 373              | 66 000                | 15 460        | 2.4      | 4.3                                                   |
| Castelo          | 55 125                 | 30 171                | 355           | 54.7     | 85.0                                                  | Carnide          | 3 688 827              | 24 900                | 19 218        | 0.7      | 1.3                                                   |
| Charneca         | 1 708 755              | 15 056                | 9 935         | 0.9      | 1.5                                                   | Estrela          | 4 604 096              | 145 000               | 20 128        | 3.2      | 7.2                                                   |
| Coração de Jesus | 557 668                | 2 808                 | 3 689         | 0.5      | 0.8                                                   | Lumiar           | 6 574 931              | 276 200               | 45 605        | 4.2      | 6.1                                                   |
| Encarnação       | 188 959                | 7 041                 | 2 252         | 3.7      | 3.1                                                   | Marvila          | 7 122 522              | 940 000               | 37 793        | 13.2     | 24.9                                                  |
| Graça            | 349 523                | 13 939                | 5 787         | 4.0      | 2.4                                                   | Misericórdia     | 2 192 199              | 11 600                | 13 044        | 0.5      | 0.9                                                   |

|                         |            |         |        |      |      |                         |           |         |        |      |      |
|-------------------------|------------|---------|--------|------|------|-------------------------|-----------|---------|--------|------|------|
| Lapa                    | 740 253    | 54 410  | 8 000  | 7.4  | 6.8  | Olivais                 | 8 088 294 | 153 000 | 33 788 | 1.9  | 4.5  |
| Lumiar                  | 6 109 910  | 593 502 | 41 163 | 9.7  | 14.4 | Parque das Nações       | 5 435 124 | 970 000 | 21 025 | 17.9 | 46.1 |
| Madalena                | 115 659    | 1 572   | 393    | 1.4  | 4.0  | Penha de França         | 2 710 761 | 21 000  | 27 967 | 0.8  | 0.8  |
| Mártires                | 99 539     | 1 521   | 372    | 1.5  | 4.1  | Santa Clara             | 3 355 563 | 248 000 | 22 480 | 7.4  | 11.0 |
| Marvila                 | 6 286 782  | 599 439 | 38 102 | 9.5  | 15.7 | Santa Maria Maior       | 3 011 592 | 30 000  | 12 822 | 1.0  | 2.3  |
| Mercês                  | 268 397    | 11 300  | 4 345  | 4.2  | 2.6  | Santo António           | 1 494 349 | 68 000  | 11 836 | 4.6  | 5.7  |
| Nossa Senhora de Fátima | 1 905 126  | 140 669 | 15 283 | 7.4  | 9.2  | São Domingos de Benfica | 4 294 403 | 368 000 | 33 043 | 8.6  | 11.1 |
| Pena                    | 500 034    | 1 300   | 4 486  | 0.3  | 0.3  | São Vicente             | 1 985 856 | 17 000  | 15 339 | 0.9  | 1.1  |
| Penha de França         | 682 770    | 6 280   | 12 780 | 0.9  | 0.5  |                         |           |         |        |      |      |
| Prazeres                | 1 440 961  | 3 538   | 8 096  | 0.2  | 0.4  |                         |           |         |        |      |      |
| Sacramento              | 85 236     | 7 461   | 742    | 8.8  | 10.1 |                         |           |         |        |      |      |
| Santa Catarina          | 213 279    | 778     | 3 716  | 0.4  | 0.2  |                         |           |         |        |      |      |
| Santa Engrácia          | 550 847    | 3 433   | 5 249  | 0.6  | 0.7  |                         |           |         |        |      |      |
| Santa Isabel            | 626 109    | 87 152  | 6 875  | 13.9 | 12.7 |                         |           |         |        |      |      |
| Santa Justa             | 246 256    | 1 321   | 891    | 0.5  | 1.5  |                         |           |         |        |      |      |
| Santa Maria de Belém    | 3 317 154  | 167 731 | 8 541  | 5.1  | 19.6 |                         |           |         |        |      |      |
| Santa Maria dos Olivais | 10 943 275 | 137 988 | 51 036 | 1.3  | 2.7  |                         |           |         |        |      |      |
| Santiago                | 64 886     | 4 200   | 619    | 6.5  | 6.8  |                         |           |         |        |      |      |
| Santo Condestável       | 1 026 525  | 3 869   | 15 257 | 0.4  | 0.3  |                         |           |         |        |      |      |
| Santo Estêvão           | 230 840    | 1 472   | 1 511  | 0.6  | 1.0  |                         |           |         |        |      |      |
| Santos-o-Velho          | 530 218    | 3 067   | 4 020  | 0.6  | 0.8  |                         |           |         |        |      |      |

|                                 |               |            |         |      |      |                |           |         |      |
|---------------------------------|---------------|------------|---------|------|------|----------------|-----------|---------|------|
| São Cristóvão e<br>São Lourenço | 77 965        | 1 572      | 1 341   | 2.0  | 1.2  |                |           |         |      |
| São Domingos<br>de Benfica      | 4 300<br>372  | 626 603    | 33 745  | 14.6 | 18.6 |                |           |         |      |
| São Francisco<br>Xavier         | 2 298<br>503  | 34 946     | 8 020   | 1.5  | 4.4  |                |           |         |      |
| São João                        | 1 506<br>196  | 30 870     | 15 187  | 2.0  | 2.0  |                |           |         |      |
| São João de<br>Brito            | 2 276<br>740  | 36 293     | 11 727  | 1.6  | 3.1  |                |           |         |      |
| São João de<br>Deus             | 924 708       | 4 452      | 9 798   | 0.5  | 0.5  |                |           |         |      |
| São Jorge de<br>Arroios         | 1 158<br>137  | 1 696      | 18 415  | 0.1  | 0.1  |                |           |         |      |
| São José                        | 329 574       | 56 342     | 2 746   | 17.1 | 20.5 |                |           |         |      |
| São Mamede                      | 614 160       | 3 054      | 5 420   | 0.5  | 0.6  |                |           |         |      |
| São Miguel                      | 51 609        | 13 768     | 1 531   | 26.7 | 9.0  |                |           |         |      |
| São Nicolau                     | 263 311       | 1 032      | 1 231   | 0.4  | 0.8  |                |           |         |      |
| São Paulo                       | 436 927       | 3 959      | 2 728   | 0.9  | 1.5  |                |           |         |      |
| São Sebastião da<br>Pedreira    | 1 084<br>510  | 288 612    | 6 342   | 26.6 | 45.5 |                |           |         |      |
| São Vicente de<br>Fora          | 315 956       | 1 337      | 3 539   | 0.4  | 0.4  |                |           |         |      |
| Sé                              | 104 470       | 11 821     | 910     | 11.3 | 13.0 |                |           |         |      |
| Socorro                         | 110 858       | 2 690      | 3 065   | 2.4  | 0.9  |                |           |         |      |
| Lisbon's:                       | 84 386<br>601 |            | 547 733 |      |      | 100 054<br>212 |           | 552 704 |      |
| PGA                             |               | 5 802 309  |         | 6.9  | 10.6 |                | 5 712 700 | 5.7     | 10.3 |
| ST                              |               | 14 177 811 |         | 23.7 | 36.5 |                | 4 797 800 | 10.5    | 19.0 |

**Table S3.** Changes over 2010 and 2020 in parishes' % of UGI. The right-most column shows the variation between 2010 and 2020 (please see materials and methods). Shading colours reflect whether the value is above or below the respective minimum recommended value: values < 5% are low (red), values between 5-30% are considered intermediate (orange) and > 30% are considered high (green).

| Parish                  | % of UGI (2010) | % of UGI (2020) | Changes in the %<br>of UGI ( $\Delta$ 2020-<br>2010) |
|-------------------------|-----------------|-----------------|------------------------------------------------------|
| Ajuda                   | 52.7            | 52.5            | 0 %                                                  |
| Alcântara               | 57.2            | 61.4            | ↑ 7%                                                 |
| Alvalade                | 36.2            | 34.9            | ↓ 4%                                                 |
| Areeiro                 | 20.6            | 20.6            | 0%                                                   |
| Arroios                 | 68.2            | 67.9            | 0%                                                   |
| Avenidas Novas          | 47.4            | 51.5            | ↑ 9%                                                 |
| Beato                   | 6.5             | 6.5             | 0%                                                   |
| Belém                   | 21.6            | 19.4            | ↓ 10%                                                |
| Benfica                 | 72.7            | 74.4            | ↑ 2%                                                 |
| Campo de Ourique        | 23.4            | 23.3            | 0%                                                   |
| Campolide               | 33.7            | 37.0            | ↑ 10%                                                |
| Carnide                 | 52.4            | 51.4            | ↓ 2%                                                 |
| Estrela                 | 7.0             | 8.4             | ↑ 20%                                                |
| Lumiar                  | 37.8            | 37.1            | ↓ 2%                                                 |
| Marvila                 | 33.0            | 32.0            | ↓ 3%                                                 |
| Misericórdia            | 2.9             | 2.9             | 0%                                                   |
| Olivais                 | 36.3            | 33.8            | ↓ 7%                                                 |
| Parque das Nações       | 18.4            | 49.6            | ↑ 170%                                               |
| Penha de França         | 16.6            | 19.0            | ↑ 14%                                                |
| Santa Clara             | 24.0            | 23.0            | ↓ 4%                                                 |
| Santa Maria Maior       | 3.2             | 3.2             | 0%                                                   |
| Santo António           | 17.3            | 12.6            | ↓ 25%                                                |
| São Domingos de Benfica | 5.3             | 4.5             | ↓ 15%                                                |
| São Vicente             | 8.1             | 8.1             | 0%                                                   |

## References

- 1 CML, 2012. Plano Diretor Municipal de Lisboa, Lisboa.
